# Supplementary material
Source: Springer Nature journal article supplement (https://www.springermedizin.de/resource/supplementary/12885_2008_1096_MOESM8_ESM.pdf/9471106)
Supplement: MOESM8 [file 9471106]

**TABLE 1:** IHC analysis of Vav3 expression in breast cancer specimens.

| Differentiation                          | Staining intensity |     |     | Intensity (>1) |
|------------------------------------------|--------------------|-----|-----|----------------|
|                                          | Negative           | 1-2 | 3-4 |                |
| Well to moderate                         | 8                  | 22  | 5   | 27/35          |
| Poor                                     | 0                  | 2   | 6   | 8/8            |
| Normal breast tissue                     | 8                  | 0   | 0   | 0/8            |
| Normal vs. tumor                         |                    |     |     | p < 0.0001     |
| Well to moderate vs poor differentiation |                    |     |     | p > 0.05       |

Differences in the IHC staining of surgical specimens of human breast cancer were analyzed with the chi-square test.
